# Supplementary material for: Phenotyping the Chilling and Freezing Responses of Young Microspore Stage Wheat Spikes Using Targeted Metabolome and Lipidome Profiling
Source: MDPI journal article supplement (doi:10.3390/cells9051309), 2020-05-25
Supplement: s1 [file s1]

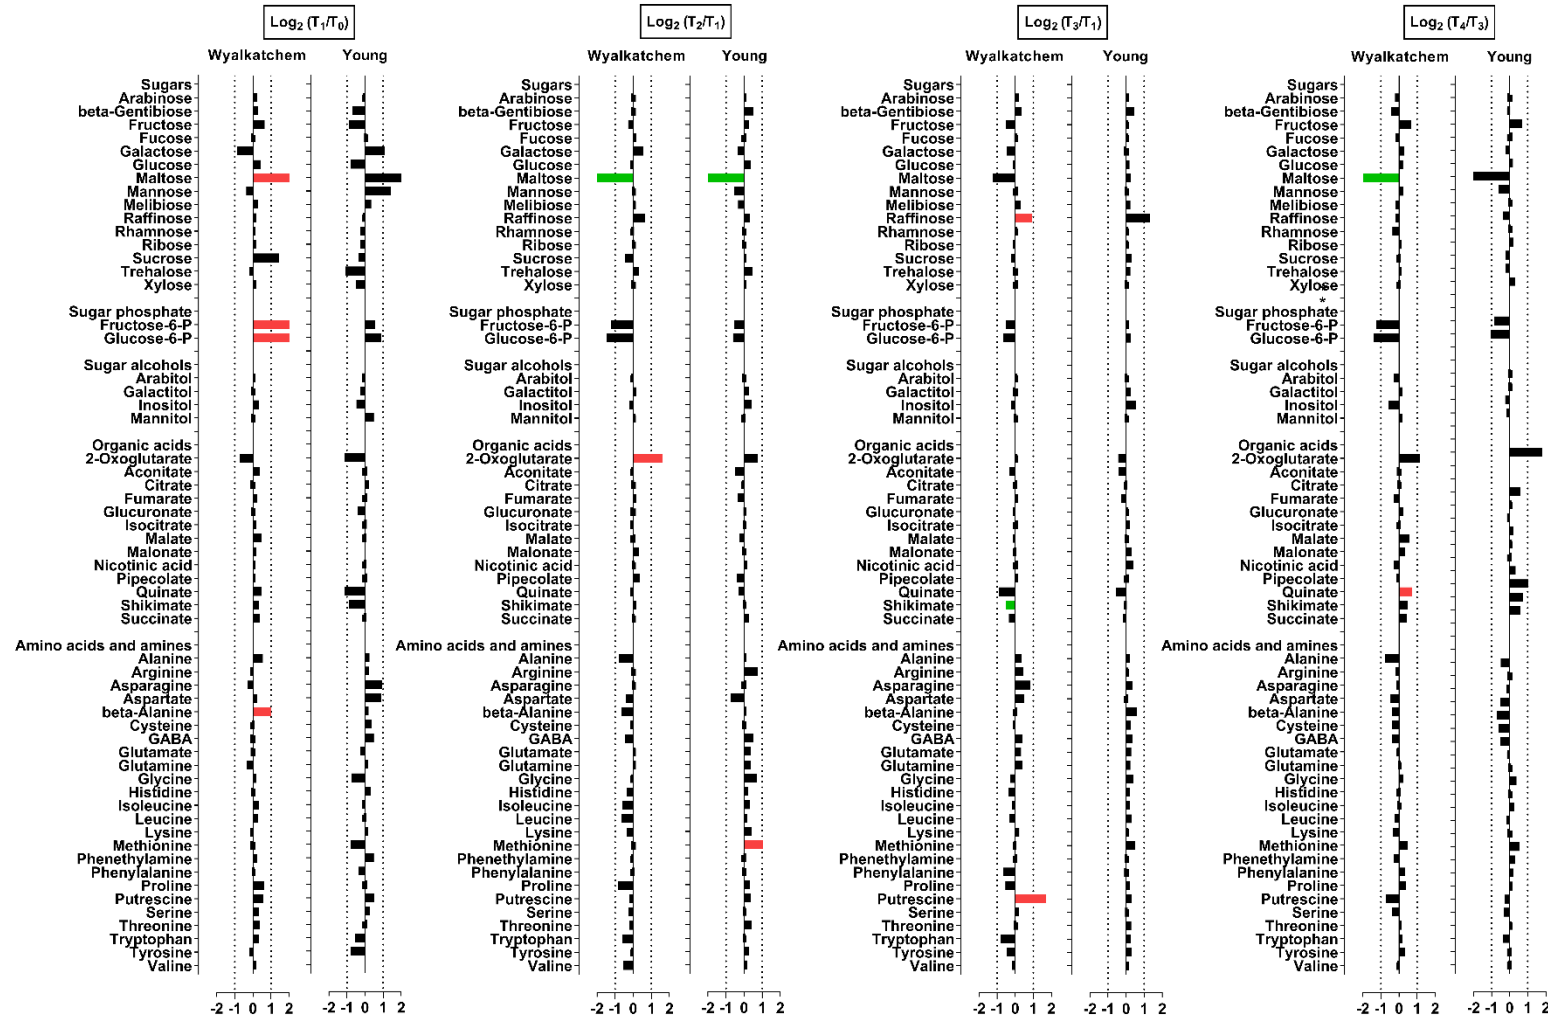

**Figure S1.** Log<sub>2</sub>-fold changes of primary metabolite concentrations in the spikes of cold-sensitive Wyalkatchem (W) and cold-tolerant Young (Y) after one night (TP<sub>1</sub> vs. TP<sub>0</sub>) and prolonged (TP<sub>3</sub> vs. TP<sub>1</sub>) exposure to cold, and the day-time recoveries after each of these cold treatments (TP<sub>2</sub> vs. TP<sub>1</sub> and TP<sub>4</sub> vs. TP<sub>1</sub>). n=3.

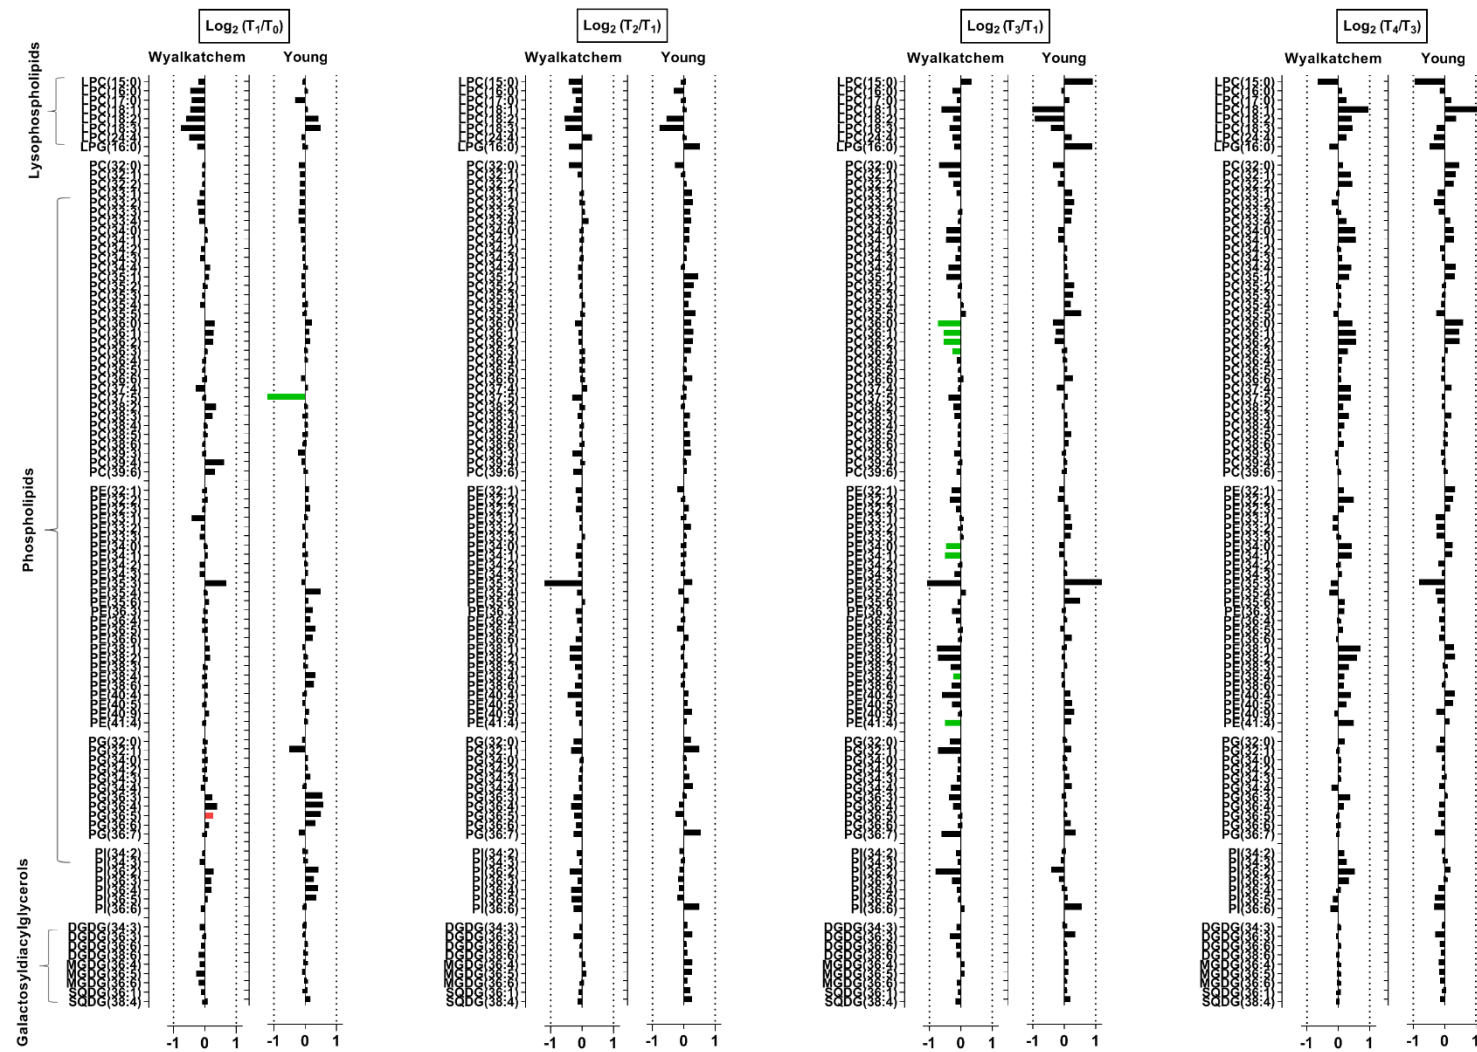

**Figure S2.** Log<sub>2</sub>-fold changes of lipid concentrations in the spikes of the cold-sensitive Wyalkatchem (W) and cold-tolerant Young (Y) after one night (TP<sub>1</sub> vs. TP<sub>0</sub>) and prolonged (TP<sub>3</sub> vs. TP<sub>1</sub>) exposure to cold, and the day-time recoveries after each of these cold treatments (TP<sub>2</sub> vs. TP<sub>1</sub> and TP<sub>4</sub> vs. TP<sub>3</sub>). n = 3.

N

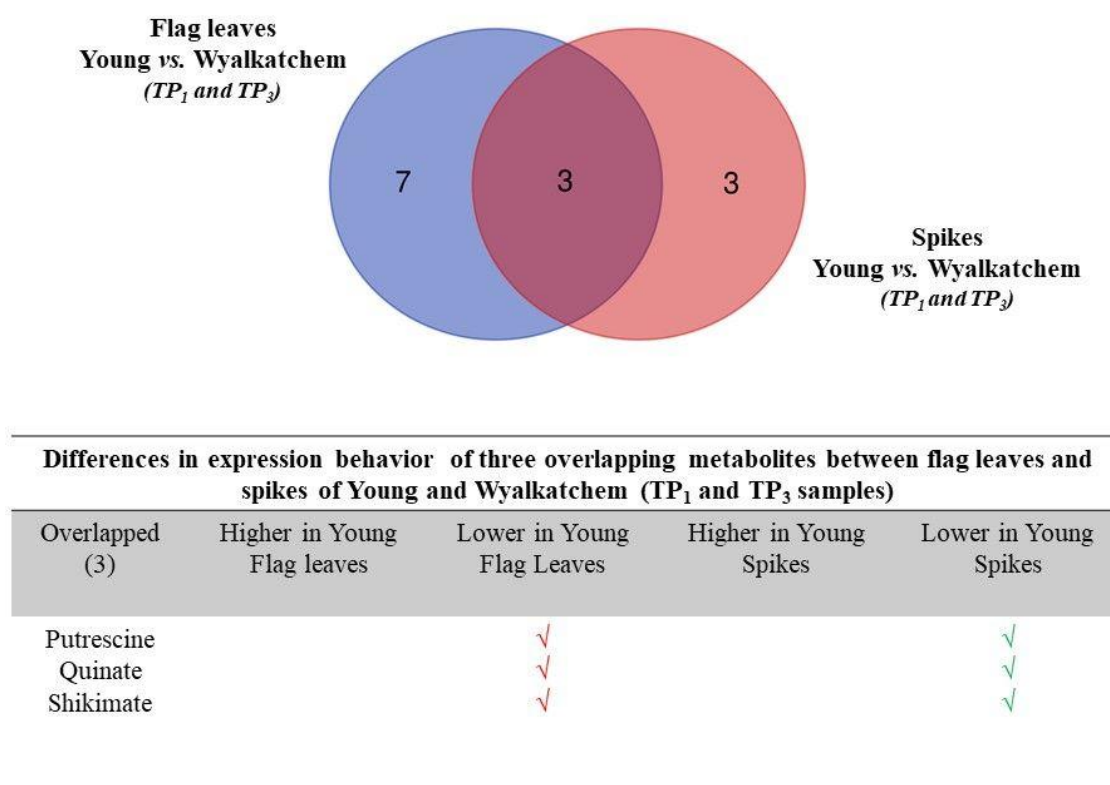

**Figure S3.** Differences in differentially expressed primary metabolites between flag leaves and spikes of cold-tolerant Young and cold-sensitive Wyalkatchem. The Venn diagrams show the degree of overlap between differentially expressed cold-induced metabolites in flag leaves and spikes for Young and Wyalkatchem. Three metabolites were commonly expressed in flag leaves and spikes at TP<sub>1</sub> and TP<sub>3</sub>. The table below shows how these three metabolites are expressed differently in Wyalkatchem and Young flag leaves and spikes.
